# Supplementary material for: Highly dispersed noble-metal/chromia (core/shell) nanoparticles as efficient hydrogen evolution promoters for photocatalytic overall water splitting under visible light
Source: Royal Society of Chemistry journal article supplement (doi:10.1039/b9nr00186g), 2009-01-01
Supplement: b9nr00186g.pdf [file b9nr00186g.pdf]

## Highly Dispersed Noble-Metal/Chromia (Core/Shell)

# Nanoparticles as Efficient Hydrogen Evolution Promoters for Photocatalytic Overall Water Splitting under Visible Light

*Naoyuki Sakamoto,<sup>a</sup> Hajime Ohtsuka,<sup>b</sup> Takahiro Ikeda,<sup>b</sup> Kazuhiko Maeda,<sup>a</sup> Daling Lu,<sup>c</sup> Masayuki  
Kanehara,<sup>b</sup> Kentaro Teramura<sup>‡</sup> Toshiharu Teranishi,<sup>b</sup> and Kazunari Domen<sup>a,\*</sup>*

<sup>a</sup> Department of Chemical System Engineering, School of Engineering, The University of Tokyo, 7-3-1 Hongo, Bunkyo-ku, Tokyo, 113-8656, Japan. <sup>b</sup> Graduate School of Pure and Applied Sciences, University of Tsukuba, 1-1-1 Tenoudai, Tsukuba, Ibaraki, 305-8571, Japan. <sup>c</sup> Center for Advanced Materials Analysis, Tokyo Institute of Technology, 2-12-1 Ookayama, Meguro-ku, Tokyo 152-8550, Japan. <sup>‡</sup> Present address: Pioneering Research Unit for Next Generation, Kyoto University.

\* To whom corresponding author should be addressed.

TEL: +81-3-5841-1148; FAX: +81-3-5841-8838; E-mail: domen@chemsys.t.u-tokyo.ac.jp

## Experimental

The GaN:ZnO solid solution as the base photocatalyst was prepared according to the method described in previous papers.<sup>[9]</sup> Briefly, a mixture of Ga<sub>2</sub>O<sub>3</sub> and ZnO powders (1.08 g Ga<sub>2</sub>O<sub>3</sub> and 0.94 g ZnO) was heated at 1123 K under NH<sub>3</sub> flow (250 mL·min<sup>-1</sup>). After 15 h of nitridation, the sample was cooled to room temperature, maintaining the NH<sub>3</sub> flow throughout. The production of GaN:ZnO with Zn/Ga molar ratio  $\approx$  0.13 was confirmed by powder X-ray diffraction (XRD) and energy-dispersive X-ray (EDX) analysis. The band gap energy of the as-obtained GaN:ZnO is 2.68 eV, as estimated from the onset of the diffuse reflectance spectrum.

The preparation of Rh/Cr<sub>2</sub>O<sub>3</sub> (core/shell) nanoparticles was carried out in a Pyrex inner irradiation-type reaction vessel connected to a glass closed gas circulation system. The Rh-loaded sample (0.25 g) was then dispersed in aqueous K<sub>2</sub>CrO<sub>4</sub> solution (400 mL, 0.18 mM). After evacuation, the solution was exposed to visible irradiation ( $\lambda > 400$  nm) for 8 h to reduce K<sub>2</sub>CrO<sub>4</sub> to Cr<sub>2</sub>O<sub>3</sub>. Irradiation was conducted using a 450 W high-pressure Hg lamp (UM-452, Ushio) and a Pyrex tube filled with sodium nitrite aqueous solution as a filter to block ultraviolet light.<sup>[9]</sup> The temperature of the reactant solution was maintained at room temperature by a flow of cooling water during the preparation procedure. The final product was washed well with distilled water and dried overnight at 343 K.

Photocatalytic reactions were carried out using the same experimental setup as used for the preparation of Rh/Cr<sub>2</sub>O<sub>3</sub> (core/shell) nanoparticles. The reactant solution consisting of 0.15 g of the catalyst and 400 mL of pure water was evacuated several times prior to the reaction to ensure that no air remained in the reaction vessel. The evolved gases were analyzed by a gas chromatograph connected directly to the closed gas circulation system.

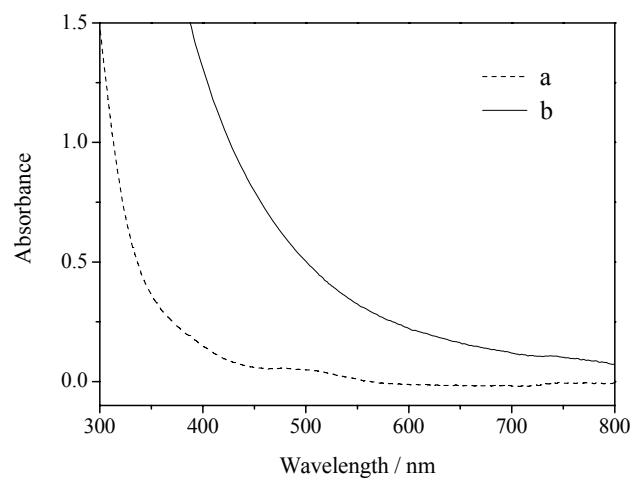

**Figure S1.** Ultraviolet-visible spectra for the aqueous preparation solution (a) before and (b) after reduction by sodium borohydride

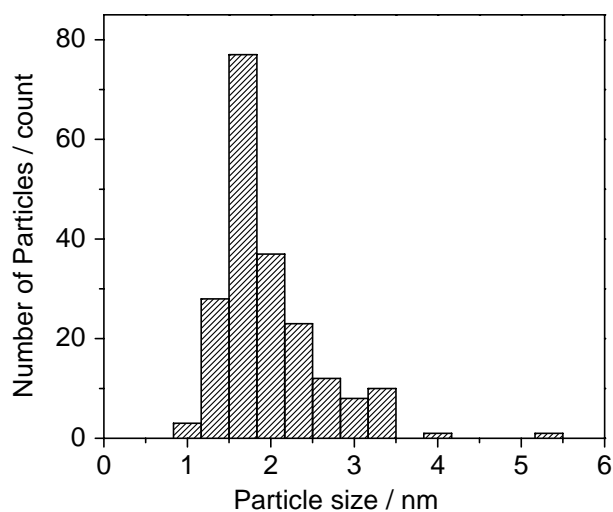

**Figure S2.** Particle size distribution histograms for Rh nanoparticles on GaN:ZnO.

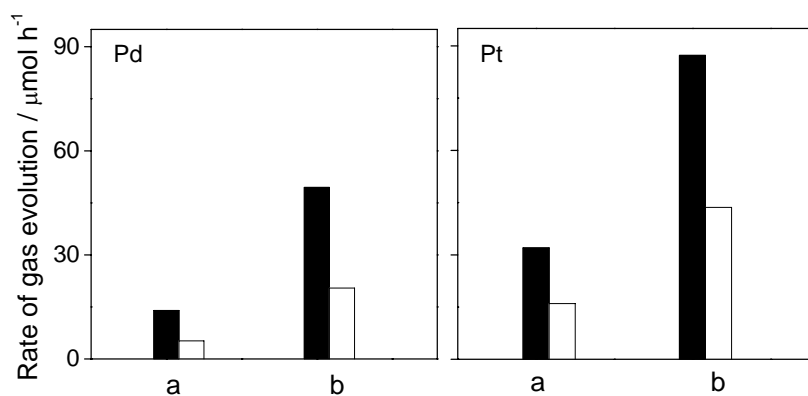

**Figure S3.** Photocatalytic activity of  $\text{Cr}_2\text{O}_3/\text{M}/\text{GaN}:\text{ZnO}$  ( $\text{M} = \text{Pd}, \text{Pt}$ ) for overall water splitting under visible irradiation ( $\lambda > 400 \text{ nm}$ ). (a) Previous photodeposition method, (b) present preparation method. Reaction conditions: catalyst, 0.15 g; distilled water, 400 mL; light source, high-pressure mercury lamp (450 W) via aqueous  $\text{NaNO}_2$  solution filter to cut ultraviolet light; reaction vessel, Pyrex inner-irradiation type.
